# Supplementary material for: The Accuracy of a Web-Based Visual Acuity Self-assessment Tool Performed Independently by Eye Care Patients at Home: Method Comparison Study
Source: PubMed Central journal article supplement (PMC9909522; doi:10.2196/41045), 2023-01-25
Supplement: formative_v7i1e41045_app2.pdf [file formative_v7i1e41045_app2.pdf]

## Multimedia Appendix 2

**Supplementary Table 1:** Multivariable GEE analysis to investigate the associations between clinical variables and the visual acuity outcomes in logMAR

|                                                      | Difference between the VA scores of the web-based and conventional test, in logMAR <sup>a</sup> |                         |                      | VA score of the web-based assessment, in logMAR |                         |                      | VA score of the conventional test, in logMAR |                         |                      |
|------------------------------------------------------|-------------------------------------------------------------------------------------------------|-------------------------|----------------------|-------------------------------------------------|-------------------------|----------------------|----------------------------------------------|-------------------------|----------------------|
|                                                      | B                                                                                               | 95% confidence interval | P-value <sup>b</sup> | B                                               | 95% confidence interval | P-value <sup>b</sup> | B                                            | 95% confidence interval | P-value <sup>b</sup> |
| Sex <sup>c</sup>                                     | 0.02                                                                                            | -0.01 to 0.06           | 0.65                 | -0.04                                           | -0.14 to 0.07           | 0.49                 | -0.05                                        | -0.16 to 0.06           | 0.38                 |
| Age                                                  | 0.00                                                                                            | 0.00 to 0.00            | 0.87                 | 0.00                                            | -0.00 to 0.01           | 0.13                 | 0.00                                         | -0.00 to 0.01           | 0.16                 |
| Use of mydriatics                                    | -0.03                                                                                           | -0.10 to 0.04           | 0.41                 | 0.15                                            | -0.20 to 0.49           | 0.41                 | 0.11                                         | -0.17 to 0.40           | 0.44                 |
| Visual acuity influencing comorbidities <sup>d</sup> | 0.01                                                                                            | -0.02 to 0.05           | 0.70                 | 0.06                                            | -0.07 to 0.18           | 0.39                 | 0.04                                         | -0.08 to 0.17           | 0.49                 |
| Symptoms at time of appointment <sup>e</sup>         | 0.02                                                                                            | -0.03 to 0.10           | 0.28                 | 0.10                                            | -0.02 to 0.21           | 0.11                 | 0.06                                         | -0.07 to 0.18           | 0.36                 |
| Interval <sup>f</sup>                                | 0.00                                                                                            | -0.00 to 0.01           | 0.37                 | 0.00                                            | -0.02 to 0.02           | 0.81                 | 0.00                                         | -0.01 to 0.02           | 0.82                 |

B: beta value; VA = Visual acuity  
 a: absolute difference between the two VA assessments in logMAR  
 b: analyzed using a Generalized Estimating Equations to correct for inclusion of two eyes of one patient  
 c: 'female' as reference  
 d: visual acuity influencing comorbidities such as: (secondary) cataract, keratitis, scleritis, corneal lesion or history of pars plana vitrectomy  
 e: symptoms associated with active uveitis at time of the hospital consultation: pain, floaters, photophobia, visual loss  
 f: interval in days between the web-based assessment and manifest assessment
